# Supplementary material for: Electronic Nicotine Delivery Systems Use and Periodontal Health—Findings from the Population Assessment of Tobacco and Health Study
Source: MDPI journal article supplement (doi:10.3390/healthcare12010025), 2023-12-21
Supplement: s1 [file s1]

**Table S1. Covariates and oral health outcomes variables**

| Variable                                                                                                                                  | Response                                                                                                                                                                                          |                                                                                                                      |
|-------------------------------------------------------------------------------------------------------------------------------------------|---------------------------------------------------------------------------------------------------------------------------------------------------------------------------------------------------|----------------------------------------------------------------------------------------------------------------------|
|                                                                                                                                           | PATH Study                                                                                                                                                                                        | This Study                                                                                                           |
| <b>Alcohol use</b>                                                                                                                        |                                                                                                                                                                                                   |                                                                                                                      |
| 1. Have you ever used alcohol at all, including sips of someone's drink or your own drink?                                                | <input type="checkbox"/> Yes <input type="checkbox"/> No                                                                                                                                          | <input type="checkbox"/> Yes <input type="checkbox"/> No                                                             |
| <b>Other tobacco Use</b>                                                                                                                  |                                                                                                                                                                                                   |                                                                                                                      |
| 2. Have you ever smoked any cigar product?                                                                                                | <input type="checkbox"/> Yes <input type="checkbox"/> No                                                                                                                                          | <input type="checkbox"/> Yes <input type="checkbox"/> No                                                             |
| 3. Have you ever smoked a pipe?                                                                                                           | <input type="checkbox"/> Yes <input type="checkbox"/> No                                                                                                                                          | <input type="checkbox"/> Yes <input type="checkbox"/> No                                                             |
| 4. Have you ever smoked a hookah?                                                                                                         | <input type="checkbox"/> Yes <input type="checkbox"/> No                                                                                                                                          | <input type="checkbox"/> Yes <input type="checkbox"/> No                                                             |
| 5. Have you ever used snus pouches?                                                                                                       | <input type="checkbox"/> Yes <input type="checkbox"/> No                                                                                                                                          | <input type="checkbox"/> Yes <input type="checkbox"/> No                                                             |
| 6. Have you ever used smokeless tobacco?                                                                                                  | <input type="checkbox"/> Yes <input type="checkbox"/> No                                                                                                                                          | <input type="checkbox"/> Yes <input type="checkbox"/> No                                                             |
| 7. Have you ever used dissolvable tobacco?                                                                                                | <input type="checkbox"/> Yes <input type="checkbox"/> No                                                                                                                                          | <input type="checkbox"/> Yes <input type="checkbox"/> No                                                             |
| <b>Behaviors and Attitudes</b>                                                                                                            |                                                                                                                                                                                                   |                                                                                                                      |
| 8. Have you ever had your teeth cleaned by a dentist, hygienist, or other health professional?                                            | <input type="checkbox"/> Yes <input type="checkbox"/> No                                                                                                                                          | <input type="checkbox"/> Yes <input type="checkbox"/> No                                                             |
| 9. In the last seven days, how many times did you use dental floss or any other device to clean between your teeth?                       | -----                                                                                                                                                                                             | <input type="checkbox"/> $\geq 7$ times <input type="checkbox"/> $< 7$ times                                         |
| 10. Based on what you believe, how much do you agree or disagree with the following statement? Smoking can cause mouth cancer in smokers. | <input type="checkbox"/> Strg. Agree <input type="checkbox"/> Agree <input type="checkbox"/> Neither agree nor disagree <input type="checkbox"/> Disagree <input type="checkbox"/> Strg. Disagree | <input type="checkbox"/> Agree <input type="checkbox"/> Neither agree nor disagree <input type="checkbox"/> Disagree |
| <b>Outcome measures</b>                                                                                                                   |                                                                                                                                                                                                   |                                                                                                                      |
| 11. Have you ever been told by a dentist, hygienist, or other health professional that you have gum disease?                              | <input type="checkbox"/> Yes <input type="checkbox"/> No                                                                                                                                          | <input type="checkbox"/> Yes <input type="checkbox"/> No                                                             |
| 12. Have you ever been told by a dentist, hygienist, or other health professional that you lost bone around your teeth?                   | <input type="checkbox"/> Yes <input type="checkbox"/> No                                                                                                                                          | <input type="checkbox"/> Yes <input type="checkbox"/> No                                                             |
| 13. Have you ever observed any bleeding after brushing or flossing, or due to other conditions in your mouth?                             | <input type="checkbox"/> Yes <input type="checkbox"/> No                                                                                                                                          | <input type="checkbox"/> Yes <input type="checkbox"/> No                                                             |
| 14. Have you ever had any teeth become loose on their own, without an injury?                                                             | <input type="checkbox"/> Yes <input type="checkbox"/> No                                                                                                                                          | <input type="checkbox"/> Yes <input type="checkbox"/> No                                                             |
| 15. How many of your permanent teeth have been removed because of tooth decay or gum disease?                                             | -----                                                                                                                                                                                             | <input type="checkbox"/> $\geq 1$ tooth <input type="checkbox"/> $< 1$ tooth                                         |
